# Supplementary material for: Genomic DNA from animals shows contrasting strand bias in large and small subsequences
Source: PubMed Central journal article supplement (PMC2267173; doi:10.1186/1471-2164-9-43), 2008-01-25

# **Genomic DNA from animals shows contrasting strand bias in large and small subsequences**

## **Supplementary File 2—Figures for Mouse**

**Kenneth J Evans**

### **Note**

This file gives two figures for mouse corresponding to the analysis for transcribed regions for human given in the main text.

### **Data**

The analysis used NCBI36 for the sequence assembly and ENSEMBL release 44 for the information on gene positions.

Figure 1: Analysis of transcribed and non-transcribed regions in unmasked mouse genome

The graph shows correlations of  $(G - C)$  versus  $(A - T)$  by window size in the unmasked mouse genome. Each point is based on a sample of 4000 windows lying entirely within a region which is transcribed (the red lower line) or not transcribed (the blue upper line). This figure corresponds to Figure 4a of the main text.

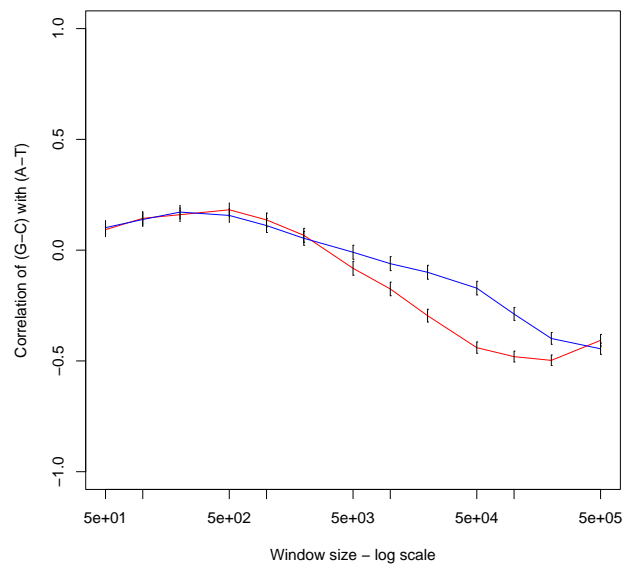

Figure 2: Analysis of transcribed and non-transcribed regions in masked mouse genome

The graph shows correlations of  $(G - C)$  versus  $(A - T)$  by window size in the unmasked mouse genome. Each point is based on a sample of 4000 windows lying entirely within a region which is transcribed (the red lower line) or not transcribed (the blue upper line). This figure corresponds to Figure 4b of the main text.

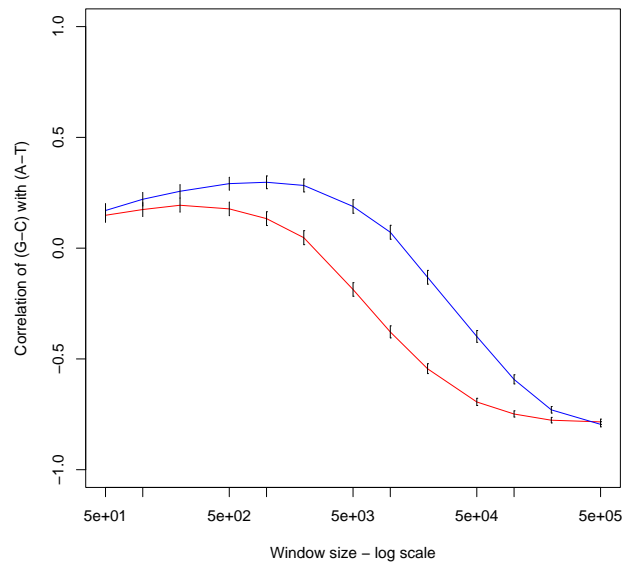

Supplement: 1471-2164-9-43-S2.pdf [file 1471-2164-9-43-S2.pdf]
